# Supplementary material for: SARS-CoV-2 seroassay optimization and performance in a population with high background reactivity in Mali
Source: PubMed Central journal article supplement (PMC7987042; doi:10.1101/2021.03.08.21252784), 2021-03-12
Supplement: NIHPP2021.03.08.21252784-supplement-1.pdf [file NIHPP2021.03.08.21252784-supplement-1.pdf]

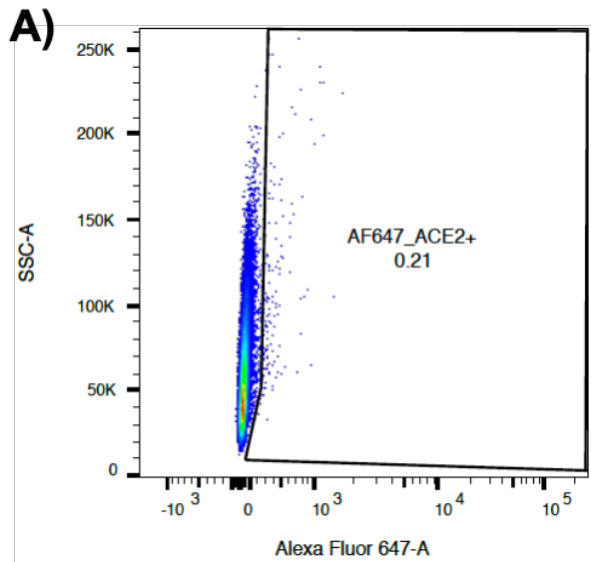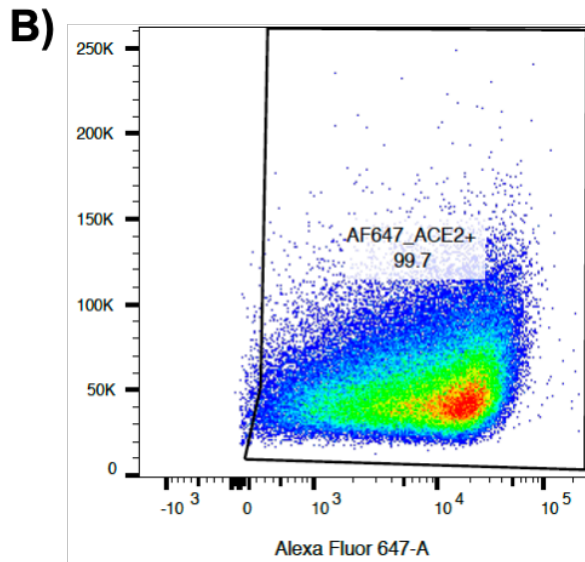

**Supplementary Figure 1:** Confirmation of BHK-21 cell ACE2 expression by flow cytometry using anti-hACE2 AlexaFluor 647-conjugated antibody. A) BHK-21 control B) BHK-21 BH-hACE2

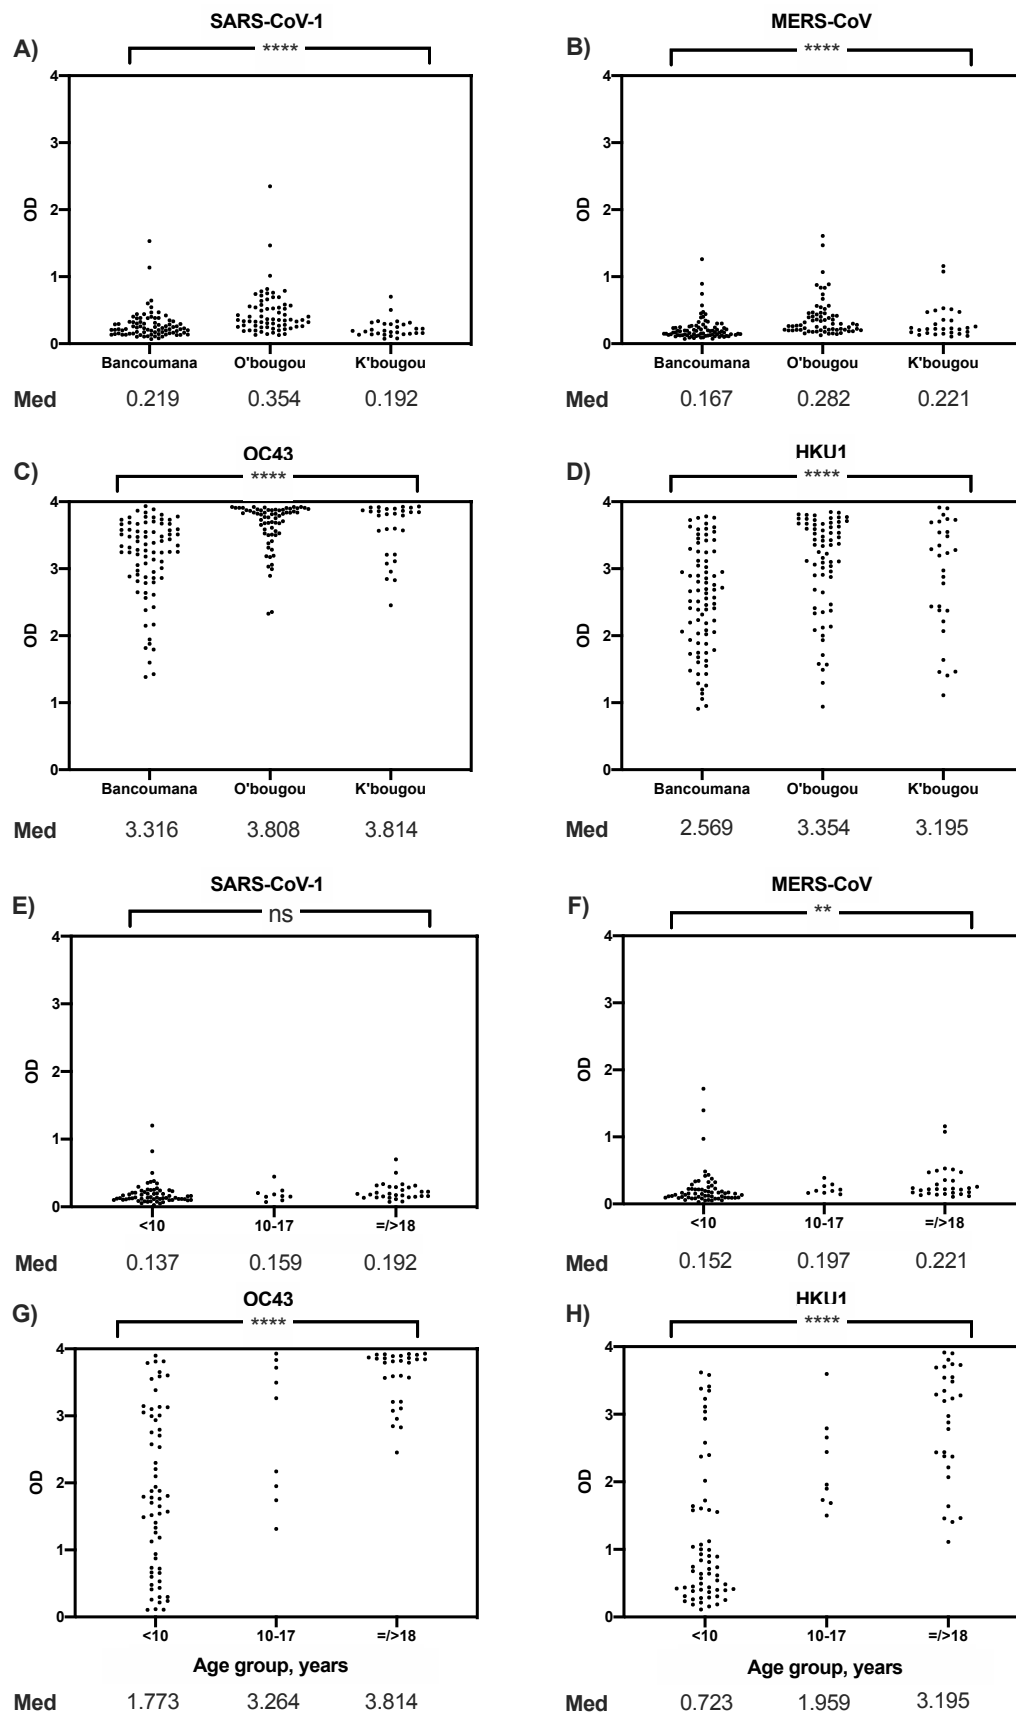

**Supplementary Figure 2:** Other betacoronavirus spike protein reactivity by site (age= $\neq$ / $>$ 18 years) in COVID-19 naïve Malian samples. A) SARS-CoV-1 B) MERS-CoV C) OC43 D) HKU1. SARS-CoV-2 antigen reactivity by age group (Kalifabougou site) E) SARS-CoV-1 F) MERS-CoV G) OC43 H) HKU1.

Med: median OD value, OD: optical density, RBD: receptor binding domain, NCP: nucleocapsid protein, O'bougou: Ouelessebougou site, K'bougou: Kalifabougou site

\*\*\*\* represents  $p < 0.0001$ , \*\*  $p = 0.001 - 0.01$ , ns represents  $p > 0.05$  using Kruskal-Wallis test.

**Supplementary Table 1: Positive control cohort population characteristics**

|                                                    |              |
|----------------------------------------------------|--------------|
| <b>Sex [male] (% , n)</b>                          | 74% [17/23]  |
| <b>Age, years (median [range])</b>                 | 35 [7-74]    |
| <b>Time since diagnosis, days (median [range])</b> | 181 [27-270] |
| <b>Severity (% , n)</b>                            |              |
| Asymptomatic                                       | 17% [4/23]   |
| Mild (no oxygen)                                   | 57% [13/23]  |
| Mod-severe (supplemental oxygen)                   | 9% [2/23]    |
| Critical (ventilator)                              | 13% [3/23]   |
| <b>Symptoms (% , n)</b>                            |              |
| Asymptomatic                                       | 17% [4/23]   |
| Paucisymptomatic                                   | 26% [6/23]   |
| Symptomatic                                        | 57% [13/23]  |

Disease severity categorized using WHO stratification criteria (Clinical Management of COVID-

19 WHO, May 27 [18])

Symptoms categorized as asymptomatic, paucisymptomatic (one symptom), or symptomatic (two or more symptoms.)

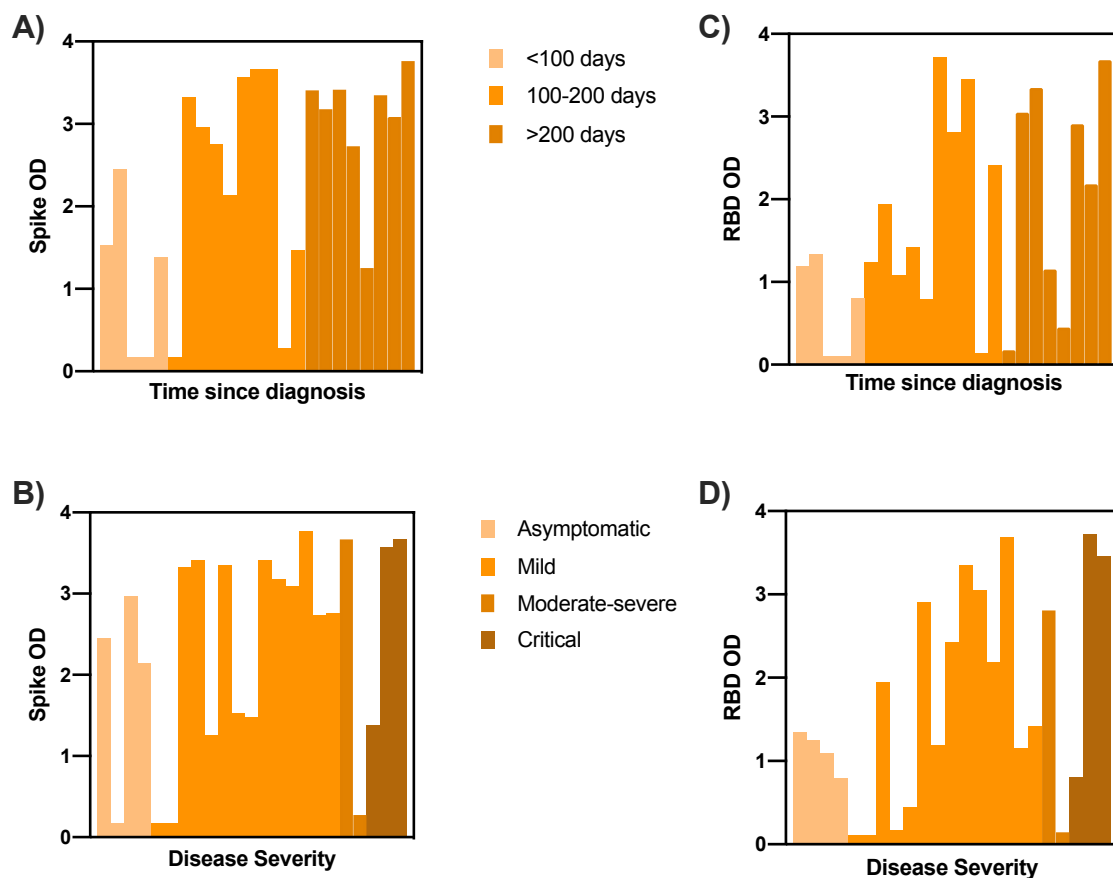

**Supplementary Figure 3:** Positive control cohort population reactivity to SARS-CoV-2 spike protein by ELISA according to: A) time since diagnosis and B) disease severity. Reactivity to RBD by ELISA according to: C) time since diagnosis and D) disease severity.

OD: optical density, RBD: receptor binding domain

Disease severity categorized using WHO stratification criteria (Clinical Management of COVID-19 WHO, May 27 [18])
